# Supplementary material for: Use of Mental Health Care and Unmet Needs for Health Care Among Lesbian and Bisexual Chinese-, Korean-, and Vietnamese-American Women
Source: Atypon-hosted journal article supplement (doi:10.1176/appi.ps.201500356), 2016-07-01
Supplement: appi.ps.201500356.ds001.pdf [file appi.ps.201500356.ds001.pdf]

## Supplementary Data

[Supplementary Table 2 about here](#)

Table 2 shows that sexual minority women had significantly higher poor to fair perceived physical health than exclusively heterosexual participants (13% vs. 10%). Chi-square tests showed that sexual minority women had significantly poorer mental health indicators than exclusively heterosexual women in all categories. Among lesbian or bisexual women, nearly 20% (vs. 12% in heterosexual participants) reported ever being diagnosed with a mental illness by a psychiatrist or psychologist, 43.4% (vs. 32%) moderate to severe depressive symptoms, and 13% (vs. 6%) reported suicidal ideation in the last year.

[Supplementary Table 3 about here](#)

Our study found that Asian-American lesbian and bisexual women are significantly more likely to report poorer mental health status (lifetime psychiatric diagnosis, depressive symptoms, and current suicide ideation) compared to their heterosexual counterparts. Table 3 presents results from multiple multivariate logistic regression models examining sexual orientation and mental health indicators, while controlling for age, education level, birthplace, and ethnicity. These models indicate that identifying as lesbian or bisexual is significantly associated with increased odds of all three mental health indicators. In addition, young Asian-American women (aged 18-24 years) were less likely to receive a psychiatric diagnosis in the past year compared to older (aged 25-35) counterparts (OR=.4), and women in the middle education group (some or all of college) were less likely to receive psychiatric diagnosis in the past year (OR=.5) compared to women in the low education group (high school or less).

**Supplementary Table 2:** Number and Prevalence of Lesbian, Bisexual and Heterosexual Asian-American Women by Mental Health Status, Mental Health Care Utilization and Unmet Needs for Health Care ( $n=701$ )

|                                                                                                     | Exclusively heterosexual<br>( $n=572$ , 82%) |                | Lesbian or bisexual<br>( $n=129$ , 18%) |                | Total<br>( $n=701$ , 100%) |                | P-value |
|-----------------------------------------------------------------------------------------------------|----------------------------------------------|----------------|-----------------------------------------|----------------|----------------------------|----------------|---------|
|                                                                                                     | $n$                                          | % <sup>a</sup> | $n$                                     | % <sup>b</sup> | $n$                        | % <sup>c</sup> |         |
| <b>Insurance status</b>                                                                             |                                              |                |                                         |                |                            |                |         |
| Non-insured                                                                                         | 97                                           | 17             | 21                                      | 16             | 118                        | 17             | .852    |
| Insured                                                                                             | 475                                          | 83             | 108                                     | 84             | 583                        | 83             |         |
| <b>Perceived physical health</b>                                                                    |                                              |                |                                         |                |                            |                |         |
| Poor or fair                                                                                        | 55                                           | 10             | 17                                      | 13             | 72                         | 10             | .014    |
| Good, very good, or excellent                                                                       | 158                                          | 28             | 49                                      | 38             | 207                        | 30             |         |
|                                                                                                     | 359                                          | 63             | 63                                      | 49             | 422                        | 60             |         |
| <b>Mental Health Indicators</b>                                                                     |                                              |                |                                         |                |                            |                |         |
| <b>Ever having psychiatric diagnosis</b>                                                            |                                              |                |                                         |                |                            |                |         |
| No                                                                                                  | 503                                          | 88             | 103                                     | 80             | 606                        | 87             | .019    |
| Yes                                                                                                 | 67                                           | 12             | 25                                      | 20             | 92                         | 13             |         |
| <b>Depressive symptom</b>                                                                           |                                              |                |                                         |                |                            |                |         |
| Minimal                                                                                             | 391                                          | 68             | 73                                      | 57             | 464                        | 66             | .011    |
| Moderate to severe                                                                                  | 181                                          | 32             | 56                                      | 43             | 237                        | 34             |         |
| <b>Suicide ideation in last year</b>                                                                |                                              |                |                                         |                |                            |                |         |
| No                                                                                                  | 538                                          | 94             | 112                                     | 87             | 650                        | 93             | .003    |
| Yes                                                                                                 | 33                                           | 6              | 17                                      | 13             | 50                         | 7              |         |
| <b>Health care utilization</b>                                                                      |                                              |                |                                         |                |                            |                |         |
| <b>Mental health care access in last year</b>                                                       |                                              |                |                                         |                |                            |                |         |
| No                                                                                                  | 513                                          | 90             | 101                                     | 78             | 614                        | 88             | .000    |
| Yes                                                                                                 | 58                                           | 10             | 28                                      | 22             | 86                         | 12             |         |
| <b>Mental health service use at least 4 times in last year (among those receiving any services)</b> |                                              |                |                                         |                |                            |                |         |
| No                                                                                                  | 31                                           | 53             | 13                                      | 47             | 44                         | 51             | .542    |
| Yes                                                                                                 | 27                                           | 47             | 15                                      | 54             | 42                         | 49             |         |
| <b>Mental health service use at least 8 times in last year (among those receiving any services)</b> |                                              |                |                                         |                |                            |                |         |
| No                                                                                                  | 40                                           | 69             | 18                                      | 64             | 58                         | 67             | .664    |
| Yes                                                                                                 | 18                                           | 31             | 10                                      | 36             | 28                         | 33             |         |
| <b>Unmet needs for health care</b>                                                                  |                                              |                |                                         |                |                            |                |         |
| No                                                                                                  | 488                                          | 85             | 89                                      | 69             | 577                        | 82             | .000    |
| Yes                                                                                                 | 84                                           | 15             | 40                                      | 31             | 124                        | 18             |         |

<sup>a,b,c</sup>Total percentages may be greater than 100 percent because percentages were rounded up.

**Supplement Table 3: Logistic Regression Analysis of Predicting Mental Health Status ( $n=701$ )**

|                                     | Ever had psychiatric diagnosis |           | Moderate to severe depressive symptoms |           | Suicide ideation in last year |           |
|-------------------------------------|--------------------------------|-----------|----------------------------------------|-----------|-------------------------------|-----------|
|                                     | OR                             | CI        | OR                                     | CI        | OR                            | CI        |
| Sexual minority (heterosexual: ref) |                                |           |                                        |           |                               |           |
| Lesbian or bisexual                 | 1.77*                          | 1.05-2.98 | 1.73**                                 | 1.16-2.57 | 2.67***                       | 1.40-5.89 |
| Age (old age: ref)                  |                                |           |                                        |           |                               |           |
| Young age                           | .40***                         | .22-.72   | 1.31                                   | .81-2.11  | 2.32                          | .76-7.04  |
| Education (low education: ref)      |                                |           |                                        |           |                               |           |
| Mid education                       | .54*                           | .30-.98   | .98                                    | .62-1.54  | .42*                          | .21-.83   |
| High education                      | .46                            | .18-1.16  | 1.24                                   | .60-2.53  | .70                           | .18-2.64  |
| Birth place (foreign born: ref)     |                                |           |                                        |           |                               |           |
| U.S. born                           | 1.24                           | .77-2.01  | 1.19                                   | .85-1.67  | .88                           | .48-1.61  |
| Ethnicity (Chinese: ref)            |                                |           |                                        |           |                               |           |
| Korean                              | 1.07                           | .60-1.89  | 1.12                                   | .74-1.68  | 1.46                          | .67-3.16  |
| Vietnamese                          | .71                            | .38-1.34  | 1.36                                   | .90-2.054 | 2.078*                        | 1.04-4.17 |
| Mixed                               | .78                            | .31-1.94  | .61                                    | .30-1.21  | .27                           | .04-2.11  |

\*  $p < .05$ \*\*  $p < .01$ \*\*\*  $p < .001$
