# Supplementary material for: Use of Mental Health Care and Unmet Needs for Health Care Among Lesbian and Bisexual Chinese-, Korean-, and Vietnamese-American Women
Source: Atypon-hosted journal article supplement (doi:10.1176/appi.ps.201500356), 2016-07-01
Supplement: appi.ps.201500356.ds001.pdf [file appi.ps.201500356.ds001.pdf]

 


Psychiatry Online
